# Supplementary material for: Mandatory role of proteinase-activated receptor 1 in experimental bladder inflammation
Source: PubMed Central journal article supplement (PMC1853108; doi:10.1186/1472-6793-7-4), 2007-03-30
Supplement: 1472-6793-7-4-S1.pdf [file 1472-6793-7-4-S1.pdf]

Table 1

## Primers for PCR

| Gene    | Forward                | Reverse                |
|---------|------------------------|------------------------|
| PAR-1   | TGTGAACTGATCATGTTTATG  | TTCGTAAGATAAGAGATATGT  |
| PAR-2   | AGAAGCCTTATTGGTAAGGTT  | AACATCATGACAGGTCGTGAT  |
| PAR-3   | CTGATACCTGCCATCTACCTCC | AGAAAACCTGTTGCCCCACACC |
| PAR-4   | ATTACTCGGACCCGAGCC     | TGTAAGGCCCCACCCTTCTC   |
| B-Actin | CCTTCCTGGGCATGGAGTCCTG | GGAGCAATGATCTTGATCTTC  |
